# Supplementary material for: Designing a Constructivist Mobile Application to Foster Creative Thinking in Undergraduate Students: Development and Evaluation
Source: Research Square preprint supplement (doi:10.21203/rs.3.rs-3113395/v1), 2023-07-21
Supplement: Supplementary file 1 [file 31cea47e22275d27b97d99d2.docx]

**Assessment of Constructivist Mobile Application to Foster Creative Thinking in Undergraduate Students (For experts)**

| **No.** | **Assessment Items** | **Average** | **S.D.** |
| --- | --- | --- | --- |
| **The content** | |  |  |
| 1 | The content and information provided are appropriate, clear, and comprehensive. | 4.33 | 0.50 |
| 2 | The content and information on the mobile application facilitate students' knowledge acquisition. | 4.44 | 0.53 |
| 3 | The language used is suitable for students and easy to understand. | 4.67 | 0.50 |
| 4 | The presentation of content is diverse, such as using emphasized text colors, static images, and animated images. | 4.44 | 0.53 |
| 5 | Problem-based learning situations align with the content and address relevant issues related to the topic being studied. | 4.78 | 0.44 |
| 6 | Problem-based learning situations encourage and stimulate students to construct their own knowledge. | 4.78 | 0.44 |
| 7 | Problem-based learning situations closely resemble real-life teaching and learning problems. | 2.89 | 0.93 |
| total | | 4.33 | 0.55 |
| **The media** | |  |  |
| 1 | The design (architecture) is appropriate, visually appealing, and engaging. | 4.00 | 0.00 |
| 2 | The format of content presentation is effective. | 4.33 | 0.50 |
| 3 | The font size used is appropriate and easy to read. | 4.44 | 0.53 |
| 4 | The graphics used are suitable and aligned with the content. | 4.44 | 0.53 |
| 5 | The use of media is appropriate and captures attention. | 4.22 | 0.44 |
| 6 | The web page with links provides efficient access to various information. | 4.44 | 0.53 |
| 7 | The utilization of media is efficient and maximizes its benefits. | 4.00 | 0.00 |
| total | | 4.27 | 0.36 |
| **The design** | |  |  |
| 1 | Support for collaborative learning and teamwork. | 4.22 | 0.67 |
| 2 | Everyone has a role in working together and making decisions to solve problems. | 4.00 | 0.00 |
| 3 | Students have autonomy in their learning and can choose to explore based on their interests. | 4.22 | 0.67 |
| 4 | The learning environment is conducive to cooperative learning and exchanging ideas with peers. | 4.00 | 0.00 |
| 5 | Encouragement for students to actively learn through hands-on practical activities. | 4.22 | 0.67 |
| 6 | Promotion of students' ability to construct knowledge and develop thinking skills on their own. | 4.11 | 0.60 |
| 7 | Opportunities for students to learn anytime and anywhere according to their preferences. | 4.00 | 0.00 |
| 8 | Learning tools that stimulate deep understanding and effectiveness. | 4.44 | 0.53 |
| 9 | Scaffolding and coaching by teachers promote problem-solving and critical thinking skills for students. | 4.00 | 0.00 |
| total | | 4.14 | 0.35 |

**Fluency Score Recording Form for Students Using Constructivist Mobile Application to Foster Creative Thinking in Undergraduate Students**

| **Student ID** | **Pre-test (full score: 5)** | **Post-test (full score: 5)** |
| --- | --- | --- |
| 1 | 1 | 5 |
| 2 | 2 | 4 |
| 3 | 1 | 4 |
| 4 | 2 | 4 |
| 5 | 2 | 5 |
| 6 | 1 | 5 |
| 7 | 1 | 5 |
| 8 | 1 | 4 |
| 9 | 1 | 4 |
| 10 | 1 | 4 |
| 11 | 1 | 5 |
| 12 | 1 | 4 |
| 13 | 1 | 5 |
| 14 | 2 | 5 |
| 15 | 1 | 4 |
| 16 | 1 | 4 |
| 17 | 2 | 5 |
| 18 | 1 | 4 |
| 19 | 2 | 5 |
| 20 | 2 | 5 |
| 21 | 2 | 5 |
| 22 | 2 | 5 |
| 23 | 1 | 4 |
| 24 | 1 | 5 |
| 25 | 1 | 5 |
| 26 | 1 | 5 |
| 27 | 1 | 4 |
| 28 | 3 | 5 |
| Average | 1.39 | 4.57 |
| S.D. | 0.57 | 0.50 |

**Flexibility Score Recording Form for Students Using Constructivist Mobile Application to Foster Creative Thinking in Undergraduate Students**

| **Student ID** | **Pre-test (full score: 10)** | **Post-test (full score: 10)** |
| --- | --- | --- |
| 1 | 3 | 9 |
| 2 | 3 | 10 |
| 3 | 3 | 8 |
| 4 | 3 | 8 |
| 5 | 2 | 8 |
| 6 | 2 | 8 |
| 7 | 2 | 8 |
| 8 | 1 | 8 |
| 9 | 2 | 9 |
| 10 | 2 | 8 |
| 11 | 2 | 9 |
| 12 | 2 | 8 |
| 13 | 2 | 9 |
| 14 | 2 | 9 |
| 15 | 2 | 10 |
| 16 | 3 | 9 |
| 17 | 1 | 7 |
| 18 | 2 | 8 |
| 19 | 4 | 10 |
| 20 | 3 | 9 |
| 21 | 3 | 9 |
| 22 | 1 | 10 |
| 23 | 3 | 9 |
| 24 | 4 | 10 |
| 25 | 3 | 10 |
| 26 | 2 | 10 |
| 27 | 3 | 8 |
| 28 | 3 | 9 |
| Average | 2.43 | 8.82 |
| S.D. | 0.79 | 0.86 |

**Elaboration Score Recording Form for Students Using Constructivist Mobile Application to Foster Creative Thinking in Undergraduate Students**

| **Student ID** | **Pre-test (full score: 10)** | **Post-test (full score: 10)** |
| --- | --- | --- |
| 1 | 2 | 10 |
| 2 | 3 | 10 |
| 3 | 2 | 8 |
| 4 | 2 | 10 |
| 5 | 2 | 10 |
| 6 | 2 | 9 |
| 7 | 2 | 7 |
| 8 | 1 | 10 |
| 9 | 2 | 8 |
| 10 | 1 | 8 |
| 11 | 1 | 10 |
| 12 | 2 | 8 |
| 13 | 2 | 9 |
| 14 | 2 | 10 |
| 15 | 2 | 8 |
| 16 | 1 | 9 |
| 17 | 1 | 10 |
| 18 | 2 | 8 |
| 19 | 1 | 9 |
| 20 | 2 | 9 |
| 21 | 3 | 9 |
| 22 | 2 | 8 |
| 23 | 3 | 10 |
| 24 | 4 | 9 |
| 25 | 3 | 9 |
| 26 | 2 | 9 |
| 27 | 3 | 10 |
| 28 | 3 | 10 |
| Average | 2.07 | 9.07 |
| S.D. | 0.77 | 0.90 |

**Originality Score Recording Form for Students Using Constructivist Mobile Application to Foster Creative Thinking in Undergraduate Students**

| **Student ID** | **Pre-test (full score: 20)** | **Post-test (full score: 20)** |
| --- | --- | --- |
| 1 | 3 | 19 |
| 2 | 5 | 18 |
| 3 | 5 | 18 |
| 4 | 4 | 19 |
| 5 | 4 | 18 |
| 6 | 5 | 17 |
| 7 | 4 | 20 |
| 8 | 5 | 17 |
| 9 | 4 | 18 |
| 10 | 5 | 18 |
| 11 | 4 | 17 |
| 12 | 5 | 18 |
| 13 | 6 | 18 |
| 14 | 3 | 20 |
| 15 | 3 | 18 |
| 16 | 2 | 16 |
| 17 | 3 | 17 |
| 18 | 4 | 17 |
| 19 | 4 | 17 |
| 20 | 3 | 17 |
| 21 | 8 | 18 |
| 22 | 4 | 17 |
| 23 | 2 | 16 |
| 24 | 4 | 18 |
| 25 | 6 | 18 |
| 26 | 4 | 18 |
| 27 | 5 | 20 |
| 28 | 8 | 20 |
| Average | 4.36 | 17.93 |
| S.D. | 1.45 | 1.12 |
